# Supplementary material for: Hybrid-Mechanism Synergistic Flexible Nb2O5@WS2@C Carbon Nanofiber Anode for Superior Sodium Storage
Source: MDPI journal article supplement (doi:10.3390/nano14070631), 2024-04-05
Supplement: s1 [file s1]

Supporting information

# Hybrid-Mechanism Synergistic Flexible Nb<sub>2</sub>O<sub>5</sub>@WS<sub>2</sub>@C Carbon Nanofiber Anode for Superior Sodium Storage

Yang Zhao <sup>1,2</sup>, Ziwen Feng <sup>1,2</sup>, Yipeng Tan <sup>1,2</sup>, Qinglin Deng <sup>1,2,\*</sup> and Lingmin Yao <sup>1,2,3,\*</sup>

<sup>1</sup> School of Physics and Materials Science, Guangzhou University, Guangzhou 510006, China; 2112119105@e.gzhu.edu.cn (Y.Z.); 2112119037@e.gzhu.edu.cn (Z.F.); 2112119039@e.gzhu.edu.cn (Y.T.)

<sup>2</sup> Research Center for Advanced Information Materials (CAIM), Huangpu Research & Graduate School of Guangzhou University, Guangzhou 510555, China

<sup>3</sup> Joint Institute of Guangzhou University & Institute of Corrosion Science and Technology, Guangzhou University, Guangzhou 510275, China

\* Correspondence: qldeng@gzhu.edu.cn (Q.D.); lingminyao@gzhu.edu.cn (L.Y.)

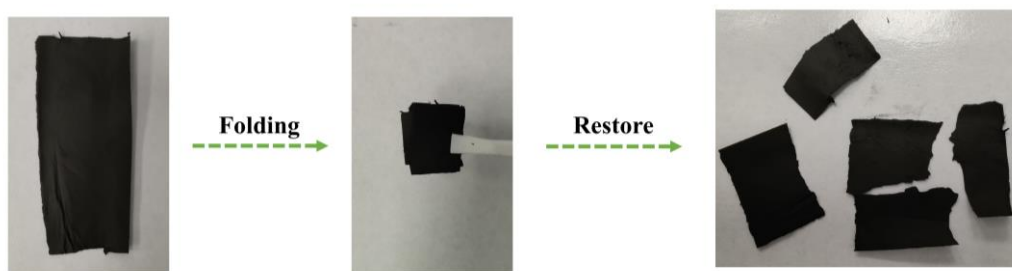

Figure S1. Photograph of pure CNFs films which were folded by many times.

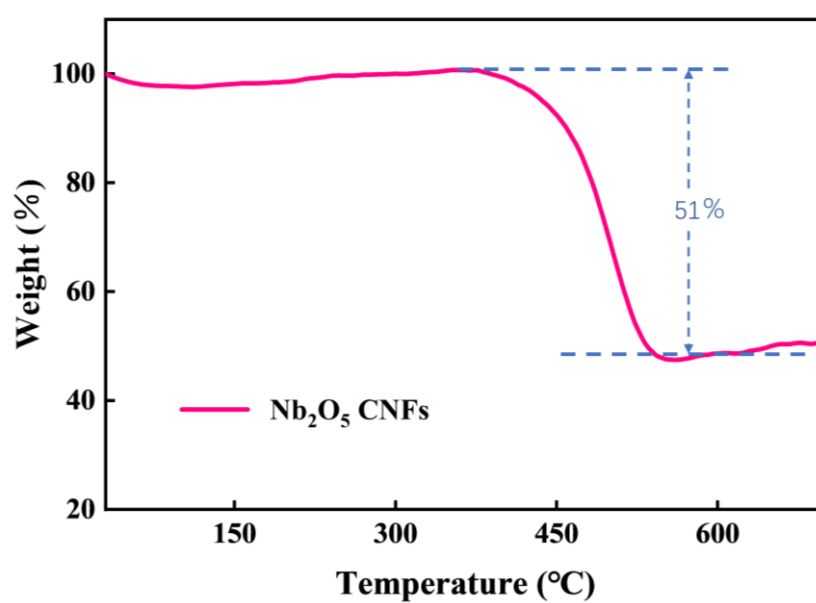

Figure S2. TG curve of Nb<sub>2</sub>O<sub>5</sub> CNFs.

Table S1. The results of elemental analysis

| Elemental             | C (%) | S (%) | O (%) |
|-----------------------|-------|-------|-------|
| Percentage of quality | 16.8  | 18.2  | 4.1   |

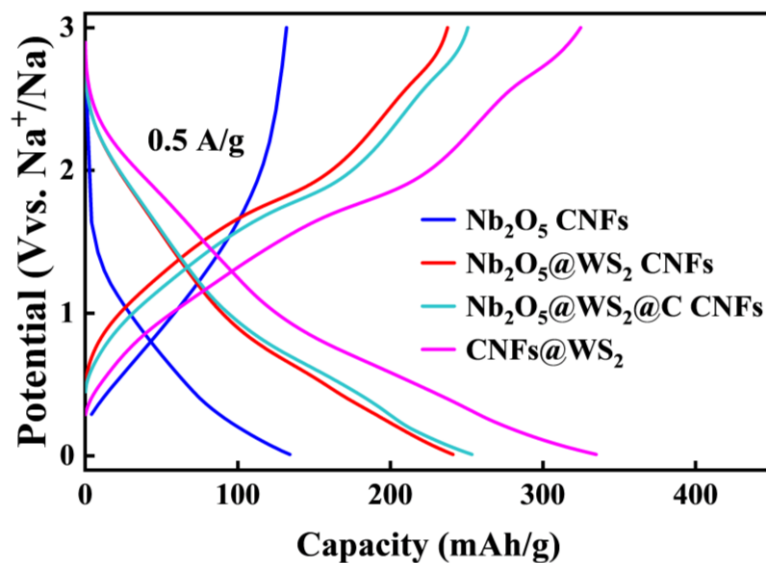

Figure S3. The GCD curve of  $\text{Nb}_2\text{O}_5$  CNFs,  $\text{Nb}_2\text{O}_5@\text{WS}_2$  CNFs,  $\text{Nb}_2\text{O}_5@\text{WS}_2@\text{C}$  CNFs and  $\text{CNFs}@\text{WS}_2$  electrodes at the current density of  $0.5 \text{ A g}^{-1}$ .

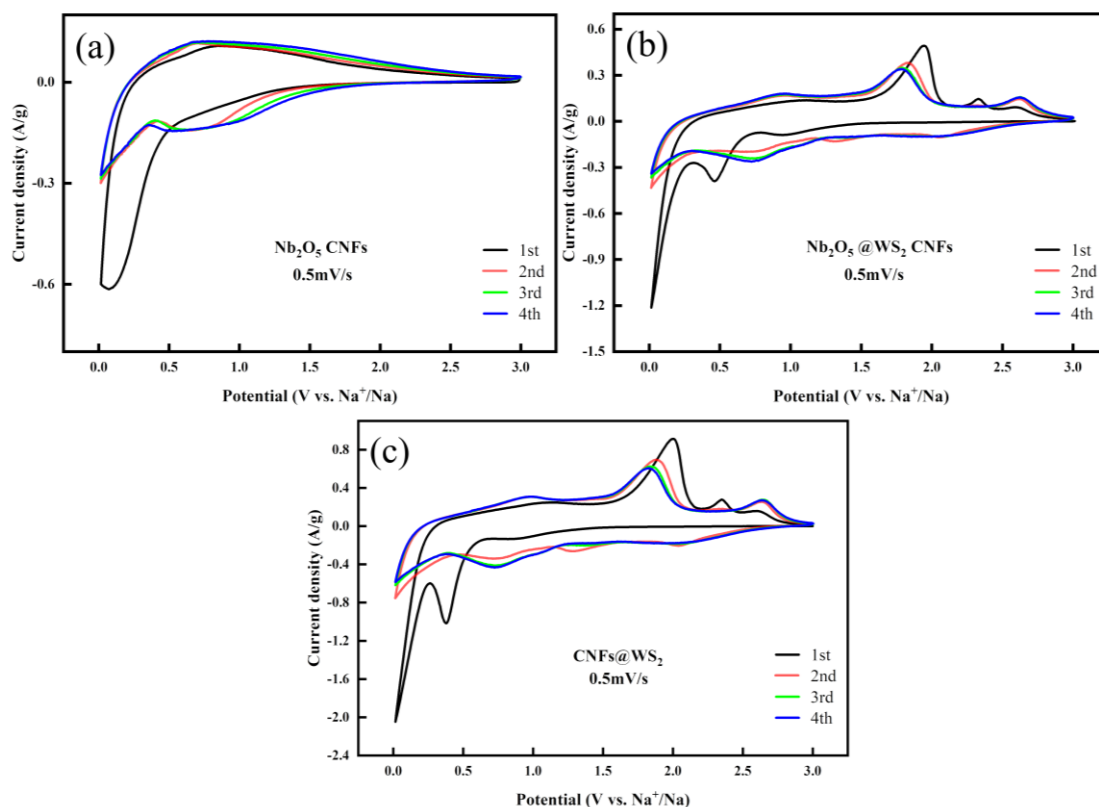

Figure S4. The CV profiles of initial four cycles for (a)  $\text{Nb}_2\text{O}_5$  CNFs, (b)  $\text{Nb}_2\text{O}_5@\text{WS}_2$  CNFs and (c)  $\text{CNFs}@\text{WS}_2$  electrodes at a scan rate of  $0.5 \text{ mV s}^{-1}$ .

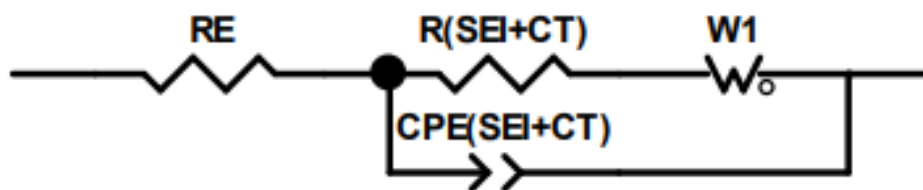

Table S2. The corresponding equivalent circuit and the calculated resistance values of the Nb<sub>2</sub>O<sub>5</sub> CNFs, Nb<sub>2</sub>O<sub>5</sub>@WS<sub>2</sub> CNFs and the Nb<sub>2</sub>O<sub>5</sub>@WS<sub>2</sub>@C CNFs.

| Electrodes                                              | $R_{(SEI+CT)}$ |
|---------------------------------------------------------|----------------|
| Nb <sub>2</sub> O <sub>5</sub> CNFs                     | 131.2          |
| Nb <sub>2</sub> O <sub>5</sub> @WS <sub>2</sub> CNFs    | 729.4          |
| Nb <sub>2</sub> O <sub>5</sub> @WS <sub>2</sub> @C CNFs | 613.4          |
